# Supplementary material for: Breast Cancer Cell Re-Dissemination from Lung Metastases—A Mechanism for Enhancing Metastatic Burden
Source: MDPI journal article supplement (doi:10.3390/jcm10112340), 2021-05-27

**Figure S1.** Immunohistochemistry of E0771-Dendra2 lung metastasis. Representative low- and high-power images of hematoxylin and eosin-stained lung metastasis (A,D) 1 week, (B,E) 2 weeks, and (C,F) 3 weeks post-injection.

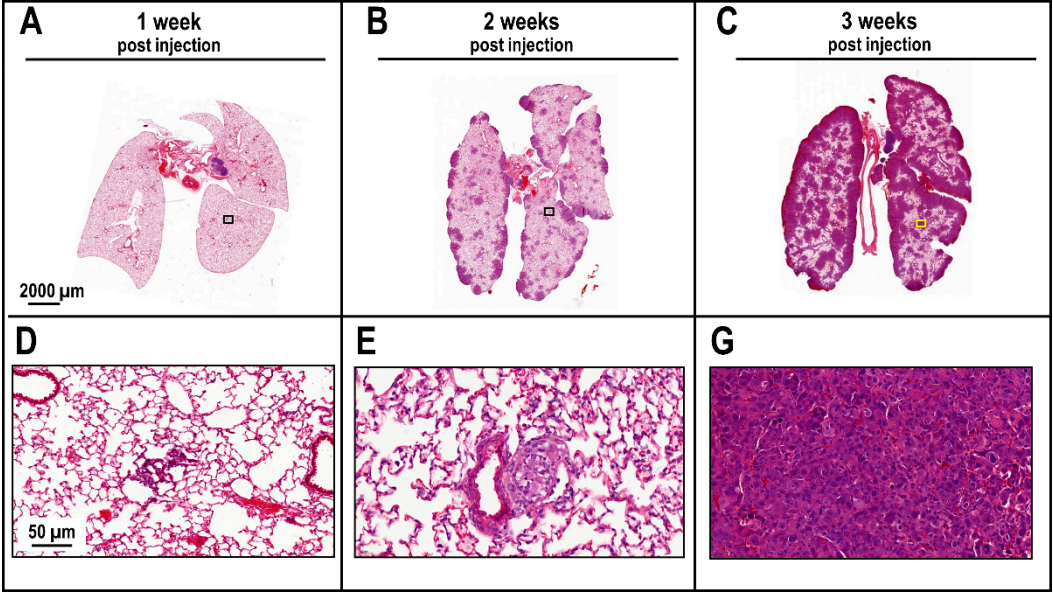

Supplement: s1 [file s1]
